# Supplementary material
Source: PubMed Central journal article supplement (PMC5097947)
Supplement: mmc1.pdf [file mmc1.pdf]

**Supplemental Data**

**Biallelic Mutations in *TMTC3*, Encoding  
a Transmembrane and TPR-Containing Protein,  
Lead to Cobblestone Lissencephaly**

**Julie Jerber, Maha S. Zaki, Jumana Y. Al-Aama, Rasim Ozgur Rosti, Tawfeg Ben-Omran, Esra Dikoglu, Jennifer L. Silhavy, Caner Caglar, Damir Musaev, Beate Albrecht, Kevin P. Campbell, Tobias Willer, Mariam Almuriekh, Ahmet Okay Çağlayan, Jiri Vajsar, Kaya Bilgüvar, Gonul Ogur, Rami Abou Jamra, Murat Günel, and Joseph G. Gleeson**

**Figure S1. *TMTC3* variants in families with Cobblestone lissencephaly.**

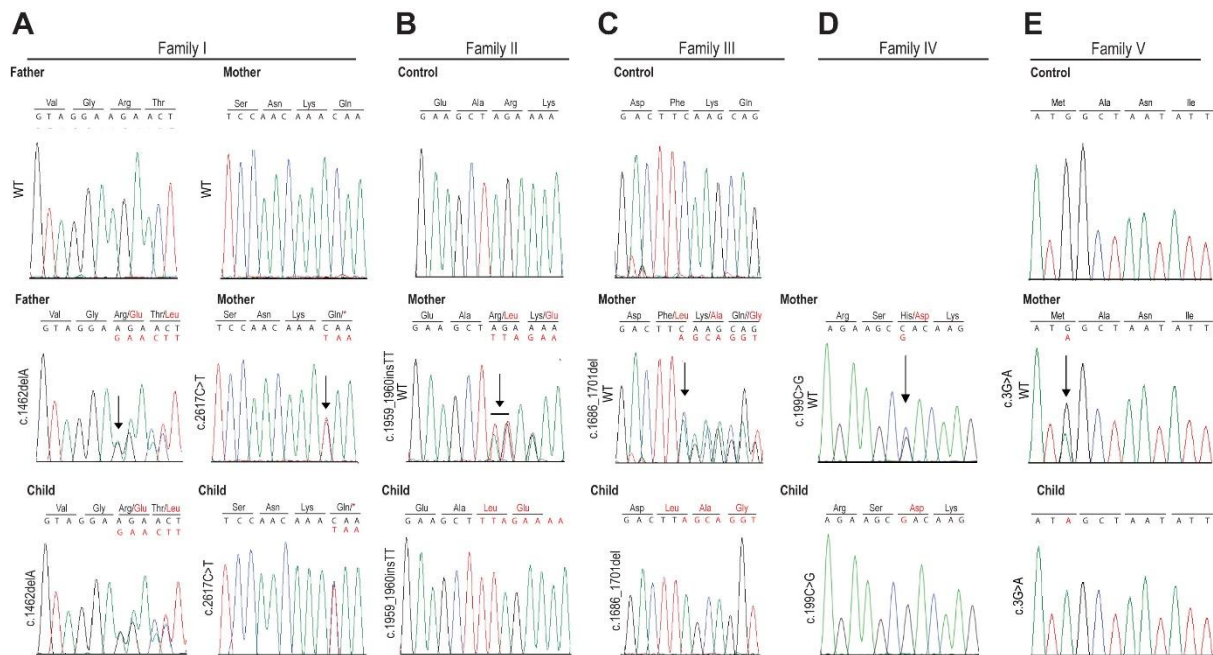

(A) Chromatograms of exons 11 and 14 showing heterozygous 1bp A deletion in exon 11 from the father and the C to T substitution resulting in a premature stop codon mutation from the mother in family I. (B) Chromatograms of exon 14 showing a TT insertion in family II. (C) Chromatograms of exon 12 showing a 30 bp deletion in family III. (D) Chromatograms of exon 3 showing a C to G substitution observed in family IV. (E) Chromatograms of exon 2 showing a G to A substitution observed in family V.

**Table S1. Summary of the pathogenic *TMTC3* (*NM\_181783.3*) variants detected in this study.**

| Family | Individual | Zygoty       | Genomic position ch12  | Exon affected | Nucleotide variant | Amino acid alteration | Type of mutation  |
|--------|------------|--------------|------------------------|---------------|--------------------|-----------------------|-------------------|
| I      | 1          | Heterozygous | 88582647               | 11            | c.1462delA         | p.Arg488Glufs*6       | Frameshift        |
|        |            | Heterozygous | 88589298               | 14            | c.2617C>T          | p.Gln873*             | Stop              |
| II     | 2          | Homozygous   | 88588639               | 14            | c.1959_1960insTT   | p.Arg654Leufs*6       | Frameshift        |
| II     | 3          | Homozygous   | 88588639               | 14            | c.1959_1960insTT   | p.Arg654Leufs*6       | Frameshift        |
| III    | 4          | Homozygous   | g.88584379_88584394del | 12            | c.1686_1701del     | p.Phe562Leufs*8       | Frameshift        |
| IV     | 5          | Homozygous   | 88547077               | 3             | c.199C>G           | p.His67Asp            | Missense          |
| IV     | 6          | Homozygous   | 88547077               | 3             | c.199C>G           | p.His67Asp            | Missense          |
| V      | 7          | Homozygous   | 88542095               | 2             | c.3G>A             | p.Met1?               | Initiation defect |
| V      | 8          | Homozygous   | 88542095               | 2             | c.3G>A             | p.Met1?               | Initiation defect |
| VI     | 9          | Heterozygous | 88566474               | 8             | c.1151G>A          | p.Gly384Glu           | Missense          |
|        |            | Heterozygous | 88589194               | 14            | c.2521dupA         | p.Ile841Asnfs*4       | Frameshift        |
